# Supplementary material for: Diagnostic assessment by dynamic contrast-enhanced and diffusion-weighted magnetic resonance in differentiation of breast lesions under different imaging protocols
Source: BMC Cancer. 2014 May 24;14:366. doi: 10.1186/1471-2407-14-366 (PMC4036635; doi:10.1186/1471-2407-14-366)
Supplement: Additional file 1 — Pictorial feature definitions. Detailed definitions of the texture and morphological features used to characterize the lesion. [file 1471-2407-14-366-S1.docx]

**Appendix 1**

#### *Morphological measurements of breast lesions*

Once the segmented lesion image is obtained, one can estimate its morphological characteristics. Fundamentally, the morphological features estimate the first-order statistics of the image.

*p*1: Compactness

,

where *P* and *S* are the perimeter length and area for a given breast MRI lesion contour, respectively.

*p*2: Spiculation

,

where *N* is the number of pixels on the lesion contour and *ri* is the individual radial length.

*p*3: Extent

where *S*box is the area of the smallest rectangle containing the given lesion contour.

*p*4: Elongation

where *H* and *L* are the vertical and horizontal lengths of the smallest rectangle containing the given lesion contour.

*p*5: Solidity

where *S*convex is the area of the smallest convex polygon that can contain the given lesion contour.

*p*6: Circularity

where is the average of *ri*.

*p*7: Entropy of radial length distribution

where *p*(*ri*) is the probability density of a given *ri*.

*p*8:Heterogeneity

Fraction of pixels that deviate more than a certain range (10% defaults) from the average intensity.

*p*9:Fractal dimension

Fractal dimension=, whereis the number of boxes of side length required to cover the lesion image.

*p10*:Area

Pixel numbers of the lesion region.

*p11*:Eccentricity

The ratio of the distance between the foci of the ellipse and its major axis length.

#### *Texture measurements of breast lesions*

To achieve comprehensive characterization of breast lesion morphology, 11 parameters were estimated automatically from gray-level co-occurrence matrix (GLCM) on the segmented lesion image. The GLCM estimates the second-order statistics of the image. Mathematically, the GLCM element over an image S is given as

，

where # represents the number of pixel-pairs. Let *N* be the number of distinct gray-levels in image S, and define,

,

,

,

,

The thirteen texture features are then calculated as

*f*1: Angular Second Moment

.

*f*2: Contrast

.

*f*3: Correlation

,

whereandare the mean and standard deviations of *px*, respectively; and are the mean and standard deviations of *py*, respectively.

*f*4: Inverse Difference Moment

.

*f*5: Sum Average

.

*f*6: Sum Variance

.

*f*7: Sum Entropy

.

*f*8: Entropy

.

*f*9: Difference Average

,

whereis the average of *p*(*i*,*j*).

*f*10: Difference Variance

,

where *d* is the mean of *px-y.*

*f*11: Difference Entropy

.

*f*12: Information Measure of Correlation 1

.

*f*13: Information Measure of Correlation 2

,

where .
